# Supplementary material for: Relative Bioavailability of Cadmium in Rice: Assessment, Modeling, and Application for Risk Assessment
Source: MDPI journal article supplement (doi:10.3390/foods12050984), 2023-02-26
Supplement: s1 [file foods-2196753-supplementary.pdf › foods-2196753-supplementary.pdf]

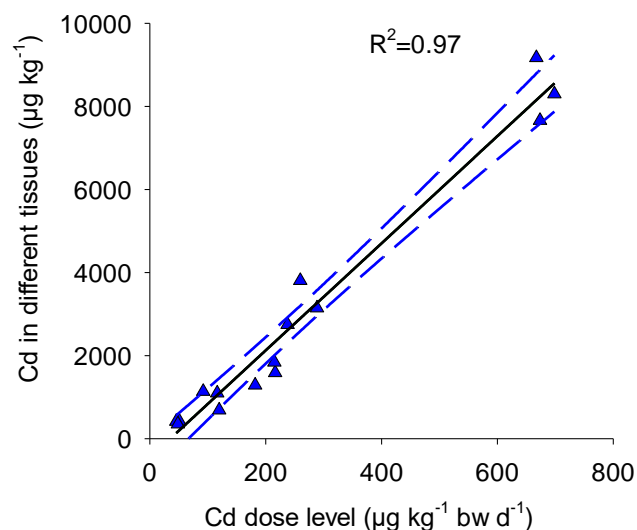

**Figure S1.** Linear dose response of Cd accumulation in liver plus kidneys to Cd dose levels following 10-d consumption of CdCl<sub>2</sub>-amended diets at 0.2–5.0 mg/kg Cd.

**Table S1.** Concentrations of Cd and nutrient elements (mean ± SD) in the 14 rice samples tested for in vivo mouse bioassay.

| Rice Sample | Cd (mg/kg)   | Ca (mg/kg)     | Fe (mg/kg)  | Zn (mg/kg)   |
|-------------|--------------|----------------|-------------|--------------|
| #1          | 0.19 ± 0.03  | 90.49 ± 18.44  | 5.32 ± 1.23 | 15.54 ± 0.07 |
| #2          | 0.22 ± 0.02  | 105.88 ± 8.84  | 5.54 ± 0.23 | 13.67 ± 0.83 |
| #3          | 0.39 ± 0.02  | 135.31 ± 5.58  | 4.92 ± 1.55 | 11.87 ± 0.21 |
| #4          | 0.45 ± 0.03  | 99.78 ± 11.61  | 5.40 ± 0.19 | 11.70 ± 0.19 |
| #5          | 0.52 ± 0.003 | 94.60 ± 16.24  | 6.08 ± 0.59 | 11.35 ± 0.45 |
| #6          | 0.63 ± 0.02  | 79.49 ± 5.81   | 2.61 ± 0.45 | 12.57 ± 0.63 |
| #7          | 0.72 ± 0.01  | 131.68 ± 4.48  | 2.85 ± 0.30 | 13.18 ± 0.18 |
| #8          | 0.90 ± 0.03  | 140.87 ± 8.94  | 3.44 ± 1.05 | 15.04 ± 0.94 |
| #9          | 1.33 ± 0.11  | 153.31 ± 4.37  | 5.46 ± 3.24 | 14.84 ± 0.66 |
| #10         | 1.35 ± 0.10  | 91.53 ± 14.97  | 5.79 ± 3.00 | 11.55 ± 0.96 |
| #11         | 1.50 ± 0.15  | 162.02 ± 7.56  | 4.56 ± 1.02 | 21.22 ± 1.66 |
| #12         | 1.74 ± 0.10  | 165.71 ± 15.65 | 7.37 ± 2.61 | 12.65 ± 0.50 |
| #13         | 2.48 ± 0.11  | 82.13 ± 6.91   | 5.45 ± 0.61 | 16.12 ± 1.12 |
| #14         | 2.54 ± 0.15  | 149.51 ± 4.94  | 6.17 ± 0.11 | 19.34 ± 0.51 |
